# Supplementary material for: Effects of daily meteorology on the interpretation of space-based remote sensing of NO 2
Source: Copernicus journal article supplement (doi:10.5194/acp-16-15247-2016), 2016-12-09
Supplement: Supplementary file 1 [file acp-16-15247-2016-supplement.pdf]

Supplement of Atmos. Chem. Phys., 16, 15247–15264, 2016  
<http://www.atmos-chem-phys.net/16/15247/2016/>  
doi:10.5194/acp-16-15247-2016-supplement  
© Author(s) 2016. CC Attribution 3.0 License.

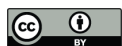

Atmospheric  
Chemistry  
and Physics  
Open Access  
EGU

*Supplement of*

## **Effects of daily meteorology on the interpretation of space-based remote sensing of NO<sub>2</sub>**

**Joshua L. Laughner et al.**

*Correspondence to:* Ronald C. Cohen (rccohen@berkeley.edu)

The copyright of individual parts of the supplement might differ from the CC-BY 3.0 licence.

## S1 Choice of weights for the monthly average profiles

When computing the monthly average profiles, it is necessary to use profiles that represent OMI's overpass time, typically quoted as 13:30 to 13:45 local standard time (e.g. McLinden et al. 2014; Levelt et al. 2006). To average the profiles output from WRF-Chem, weights were calculated that fulfilled two requirements:

1. The weights should be 1 at OMI overpass time and 0 when more than 1 hour away from overpass time.
2. The transition between profiles from different hours should be smooth.

For #1, we assume that the average overpass time is 1330 local standard time. We compute local standard time as:

$$t_{\text{apriori, local}} = \frac{l}{15} + t_{\text{apriori, utc}} \quad (\text{S1})$$

where  $t_{\text{apriori, local}}$  is the local standard time in hours past midnight,  $t_{\text{apriori, utc}}$  the UTC time in hours past midnight, and  $l$  the longitude (west is negative). To meet the second requirement, this is a continuous function, rather than a step function (where each  $15^\circ$  longitudinal segment/time zone has a single local time). Areas further west in a time zone are more likely to be observed on the east edge of a later OMI swath, and vice versa for areas further east. This weighting includes some influence from later profiles to account for this.

The weights from Eq. (6) are derived from:

$$w = 1 - |t_{\text{overpass}} - t_{\text{apriori, local}}| = 1 - \left| 13.5 - \frac{l}{15} - h \right| \quad (\text{S2})$$

where  $t_{\text{overpass}}$  is the assumed overpass time for OMI and  $h \equiv t_{\text{apriori, utc}}$ . If  $w < 0$ ,  $w$  is set to 0. This gives us the desired form where the weights smoothly vary in time.

## S2 Influence of boundary layer vs. free troposphere

Figure S2 illustrates the possible effects on the AMF of day-to-day changes in the a priori upper troposphere  $\text{NO}_2$  profile. From Sect. 2.2, Eq. (2) and Eq. (3) show that it is the relative contribution of each altitude to the a priori profile that determines the AMF. Therefore, if an increase in near-surface  $\text{NO}_2$  is balanced by an increase in upper tropospheric  $\text{NO}_2$ , there may be no or very little net change to the AMF. This is the case to the left of the city in Fig. S2. However, the reverse can also occur,

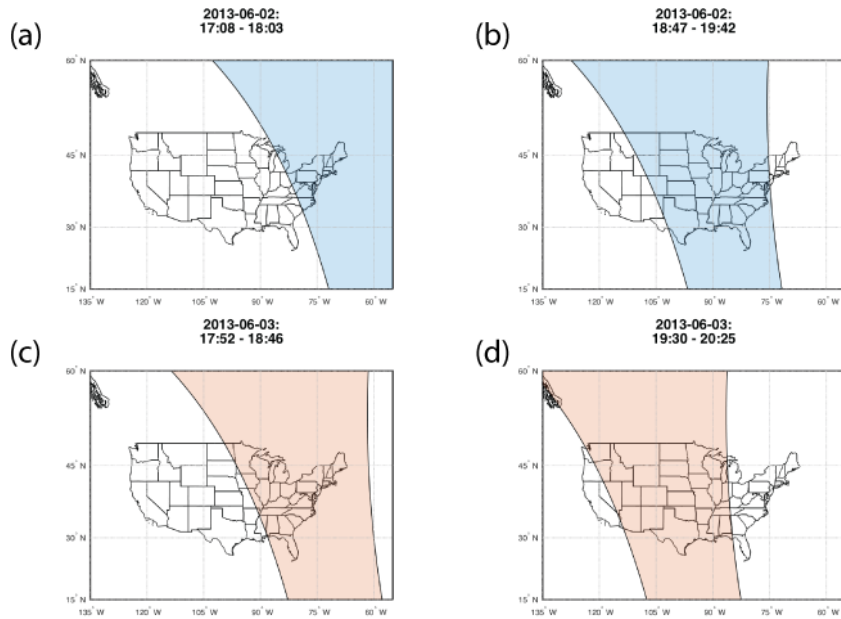

**Figure S1.** Swaths covering the east coast of the US for 2 June 2013 (a,b) and 3 June 2013 (c,d). The times given are the start and end times of the daytime half of the orbit in UTC. As shown, on different days, the time of the OMI swath that covers Atlanta can vary by up to an hour.

where changes in the upper tropospheric a priori profile accentuate the effect of changes near the surface. This occurs to the right of the city in Fig. S2.

Here we consider the magnitude of the effect day-to-day changes in the free tropospheric  $\text{NO}_2$  profile have on the retrieval. Figure S3 compares the difference in pseudo-retrieval AMFs among the three a priori types used: the daily profiles over the full extent of the troposphere, “hybrid” daily profiles which include day-to-day variation in boundary layer but use a monthly average above 750 hPa, and the monthly average profiles. These statistics are derived over the entire pseudo-retrieval domain for the entire time period. Comparing either the full or hybrid daily profile to the monthly average profile yields very similar statistics. Both exhibit a positive median change (+1.7% full, +2.0% hybrid) and show similar upper and lower quartiles. When using the full daily profile, the range of the most extreme values is slightly greater, occurring when the changes in the boundary layer and free troposphere act in the same direction on the AMF.

The third column shows the difference between the hybrid and full daily profile AMFs. The mean and median differences are nearly 0 (−0.4% and −0.2% respectively), with upper and lower quartile values of +2.20% and −2.88%. This is  $\sim 35\%$  of the interquartile range of the difference between AMFs resulting from either the full or hybrid daily profiles and the monthly average profile. Day-to-day changes in the free tropospheric a priori profile are smaller in magnitude than those in the boundary layer, but usually occur over a much greater vertical extent. Further, the scattering weights are greater at these altitudes ( $\sim 2\text{--}8$  times those near the surface), amplifying the effect of small changes in the profile shape at these altitudes. This explains why

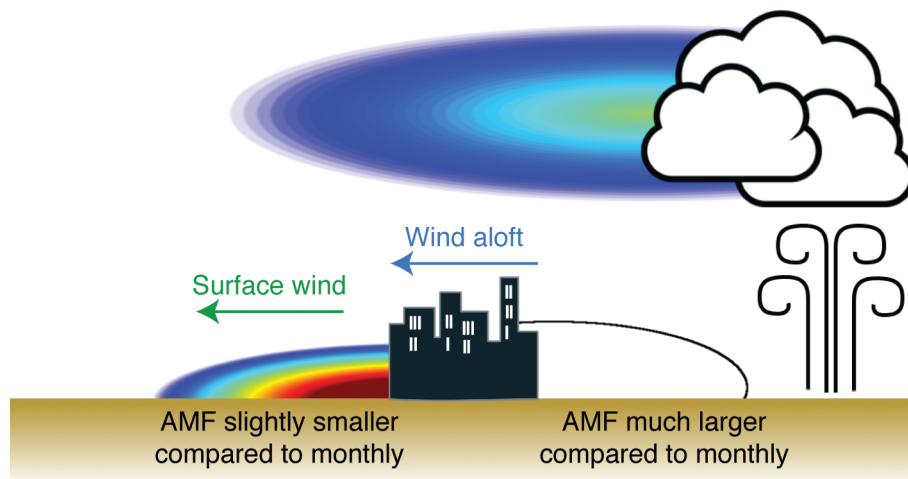

**Figure S2.** An illustration of how day-to-day variations in the upper troposphere impact the calculation of the AMF. The colored gradients represent the day-to-day NO<sub>2</sub> plumes, the black outline represents the monthly average plume. To the left of the city, the increase in near-surface NO<sub>2</sub> compared to the monthly average would result in a much smaller AMF; however the addition of NO<sub>2</sub> in the upper troposphere balances this, keeping the difference in AMF smaller. To the right, both the lack of near-surface NO<sub>2</sub> and the introduction of NO<sub>2</sub> in the upper troposphere result in a much greater AMF than the monthly average.

the effect on the AMF is as large as it is, although day-to-day changes in the boundary layer still dominate the effect using daily profiles has on the AMFs. It should be noted that these a priori are derived from a model without lightning NO emission; therefore this should be considered a lower bound for the effect of the free tropospheric profile. The presence of lightning NO<sub>x</sub> would likely lead to larger increases in AMF due to the higher upper tropospheric sensitivity.

The implications of this response are varied. For applications (such as data assimilation) where reducing the uncertainty in a single day's observations is critical, this result indicates that accurate modeling of upper tropospheric NO<sub>2</sub> is important. However, over the 91 days of this study, the effect of including a daily free tropospheric a priori profile averages out to nearly 0. Winds in the free troposphere are not correlated with surface winds (Endlick et al., 1969). In methods sorting observations by wind speed or direction (Valin et al., 2013; Lu et al., 2015), day-to-day variations in the AMF due to changes in the free troposphere will therefore be random in character. Over long periods of averaging, the impact due to these variations will have no net impact. Only changes associated with the surface winds will lead to systematic changes in the results obtained by these methods.

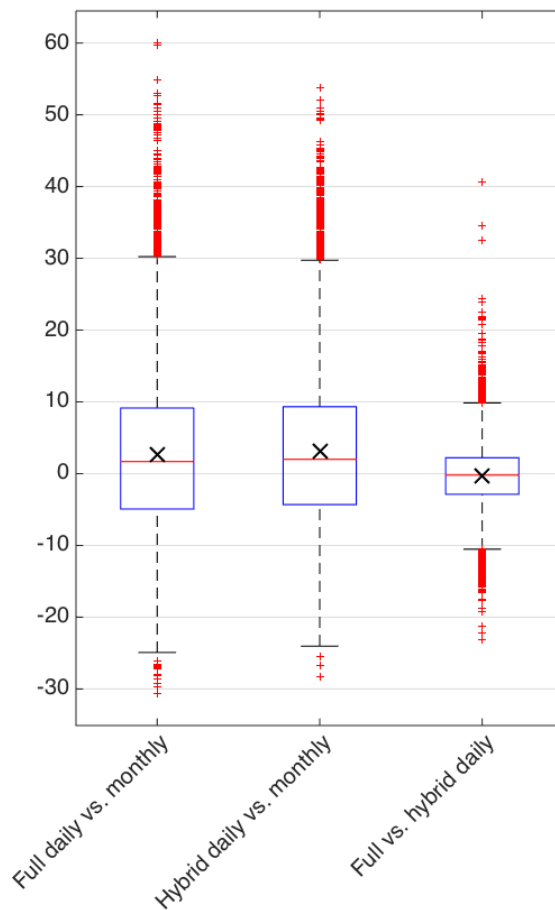

**Figure S3.** Percent changes in the AMF for the pseudo-retrieval over the full time period (1 June to 30 Aug) among the three a priori used in the pseudo-retrieval. For “new vs. base,” the percent change is calculated as  $(\text{new} - \text{base})/\text{base} \times 100\%$ . The red line is the median, the box edges are the 25th and 75th percentiles, the whiskers cover the remainder of the data not considered outliers, and the red pluses are outliers. A point is considered an outlier if it is more than 1.5 times the interquartile range from the closer quartile. The black X marks the average.

### S3 EMG fitting algorithm details

The EMG fitting was carried out by minimizing the residuals between the EMG function and the line densities using the Matlab function `fmincon`, which allows constrained non-linear fitting using an interior-point algorithm. Additionally, the following three refinements were necessary.

- 5     – The constraints listed in Table S1 must be imposed to ensure physically realistic values of  $a$ ,  $x_0$ ,  $\mu_x$ ,  $\sigma_x$ , and  $B$  are obtained.
- Any not-a-number (NaN) values in the EMG function (Eq. 9) are replaced with infinity, thus making the fitting function (Eq. 10) report that the current values of  $a$ ,  $x_0$ ,  $\mu_x$ ,  $\sigma_x$ , and  $B$  are unacceptable. NaNs occur in the EMG function when the exponential goes to infinity and the error function to zero, typically when the fitting parameters are unrealistically  
10     large or small and the fit is incorrectly a flat line. By doing this replacement and treating NaNs as 0 in the summation in Eq. (10), we allow NaNs to occur in the line densities (representing missing data, which is thus ignored) but not the fit.
- The minimization algorithm requires an initial value for  $a$ ,  $x_0$ ,  $\mu_x$ ,  $\sigma_x$ , and  $B$ . For the first minimization, best-guess values for these are computed as specified in Table S1 (see supplement for rationale for each). However, an interior-point minimization algorithm uses a line search strategy which minimizes a function by following the derivative at the  
15     current point “downhill” (Robere, 2012; Wright, 2005). If the algorithm begins in a region from which the downhill path leads to a local, rather than global, minimum, the global minimum may never be found by this algorithm. This can be alleviated by carrying out multiple minimizations, starting from a different point each time, and choosing the result with the smallest residual. The randomization draws from the range of values defined by the upper and lower limits for each  
20     parameter with a uniform probability distribution. For  $a$  and  $x_0$ , upper bounds of  $5 \times 10^6$  mol and 1000 km, respectively, are used during the randomization process, as a finite upper bound is necessary for the randomization algorithm. This randomization and reoptimization was carried out nine times per fit. Additional randomization of the initial point does not improve the fit. Each time the optimum value of the fitting function is compared to the previous minimum; if it is less, the new fit is accepted.

The constraints listed in Table S1 were found to be necessary to ensure that a physically realistic fit was obtained. The  
25     following upper and lower limits for each of the parameters were imposed:

- $a \in [0, \infty)$ :  $a$  corresponds to the total  $\text{NO}_2$  burden and therefore must be a positive value.
- $x_0 \in [1.6, \infty)$ :  $x_0$  is the distance traveled by the plume in one lifetime. Therefore it must be positive; however, if it becomes too small, the fit fails (returning a flat line). At very slow wind speeds of  $1 \text{ m s}^{-1}$ , a short lifetime of 1 h would translate to an  $x_0$  of 3.6 km, we choose a minimum value for  $x_0$  shorter than this to allow for the possibility of  
30     very short lifetimes. 1.6 km was specifically chosen as one-third the distance between adjacent data points in the line densities on the oversampled  $0.05^\circ \times 0.05^\circ$  ( $\approx 5 \times 5$  km) grid. This means that three lifetimes would pass and  $> 95\%$  of

| Parameter                                                                                                           | Physical significance           | Lower Bound | Upper Bound                       | Best guess initial value                       |
|---------------------------------------------------------------------------------------------------------------------|---------------------------------|-------------|-----------------------------------|------------------------------------------------|
| $a$ (mol)                                                                                                           | NO <sub>2</sub> burden          | 0           | $\infty$                          | $\int_{x_{\min}}^{x_{\max}} \text{NO}_2(x) dx$ |
| $x_0$ (km)                                                                                                          | Distance traveled in 1 lifetime | 1.6         | $\infty$                          | 54                                             |
| $\mu_x$ (km)                                                                                                        | Emission center                 | $\min(x)$   | $\max(x)$                         | $x_{\max(\text{NO}_2)}$                        |
| $\sigma_x$ (km)                                                                                                     | Gaussian smoothing              | 2.5         | $x_{\max(\text{NO}_2)} - \min(x)$ | FWHM / 2.355                                   |
| $B$ (mol)                                                                                                           | Background                      | 0           | $\max(\text{NO}_2)$               | $\min(\text{NO}_2)$                            |
| Additional constraints                                                                                              |                                 |             |                                   |                                                |
| $\mu_x + x_0 \leq \max(x)$ $\exp\left(\frac{\mu_x}{x_0} + \frac{\sigma_x^2}{2x_0^2} - \frac{x}{x_0}\right) \leq 20$ |                                 |             |                                   |                                                |

**Table S1.** Constraints imposed on the solutions permitted to the interior point algorithm, in the form of upper and lower bounds, with additional linear and nonlinear constraints.  $x$  refers to the  $x$ -coordinates associated with the data, i.e. distance from the city center.  $x_{\max(\text{NO}_2)}$  indicates the  $x$  coordinate where the greatest NO<sub>2</sub> line density is present. NO<sub>2</sub> refers to the values of the line density. FWHM is the full width at half maximum of the Gaussian. For additional discussion of the reasoning for the selection of these values, see the supplement.

the NO<sub>x</sub> enhancement due to a source would be removed; shorter lifetimes than this are unlikely to be resolved at this grid resolution.

- $\mu_x \in [\min(x), \max(x)]$ :  $\mu_x$  is the apparent position of the emission center relative to the geographic city center. It must be within the domain of distances chosen, otherwise the domain was chosen poorly.
- 5 –  $\sigma_x \in [2.5, x_{\max\text{NO}_2} - \min(x)]$ :  $\sigma_x$  is the Gaussian smoothing parameter, serving the same role as the  $\sigma$  parameter in any Gaussian function. 2.5 km was chosen as the lower bound under the assumption that the smallest observable Gaussian requires at least 3 data points (the base on either side and the maximum). As  $\sigma = 4 \times$  (full width at base) this implies that the smallest observable signal is  $\frac{1}{2}$  the oversampled grid resolution: if only 3 points defined the Gaussian, one-half the full width at the base ( $= 2\sigma$ ) would fit within one grid cell. The upper limit simply specifies that  $\sigma_x$  cannot be larger
- 10 than the distance from the upwind edge of the domain to the  $x$ -coordinate of maximum line density, i.e. that the Gaussian build-up on the upwind side is fully captured in the domain.
- $B \in [0, \max(\text{NO}_2)]$ :  $B$  is the background line density. It must be positive, and should not be larger than the maximum observed line density.

Two additional constraints were imposed using the ability of `fmincon` to accept linear and nonlinear relationships between

15 the fitting parameters:

- $x_0 + \mu_x \leq \max(x)$ : Simply, one lifetime must pass between the apparent emissions center and the downwind edge of the domain. If not, the domain was chosen poorly.

- $\exp\left(\frac{\mu_x}{x_0} + \frac{\sigma_x^2}{2x_0^2} - \frac{x}{x_0}\right) \leq 20$ : This is a second numerical constraint to prevent the case where the exponential goes to infinity and the error function complement goes to 0, thus creating a return value of NaN from the fitting function. (The first numerical constraint is the replacement of NaNs with infinity discussed in the main text.)

For the best-guess initial values:

- 5 –  $a = \int_{x_{\min}}^{x_{\max}} \text{NO}_2(x) dx$ : Since  $a$  corresponds to the total burden of  $\text{NO}_2$  present, we use the integral over the domain as the initial guess.
- $x_0 = 54$ : A best guess of 54 km follows from an average summer lifetime of 3 h (Lu et al., 2015) and a wind speed of 5  $\text{m s}^{-1}$ .
- $\mu_x = x_{\max(\text{NO}_2)}$ : Logically, one would expect the apparent emission source to be somewhat near the maximum concentration, the fitting procedure can then identify if it is slightly displaced.
- 10 –  $\sigma_x = \text{FWHM}/2.355$ : This uses the relationship between the full width at half max and the standard deviation of a Gaussian. The half maximum line density is computed as:

$$\text{HM} = \frac{\max(\text{NO}_2) - \text{NO}_2(x_{\min})}{2} \quad (\text{S3})$$

The FWHM is then:

$$15 \quad \text{FWHM} = |x_{\text{HM}} - x_{\max(\text{NO}_2)}| \quad (\text{S4})$$

where  $x_{\text{HM}}$  is the  $x$ -coordinate where the half-max exists, found by interpolating to the half maximum line density.

- $B = \min(\text{NO}_2)$ : It is a natural guess that the background is simply the lowest observed line density.

#### S4 Computation of uncertainty in EMG parameters ( $a$ , $x_0$ , $\mu_x$ , $\sigma_x$ , $B$ , $E$ , and $\tau$ )

20 To compute the uncertainty in both the fitting parameters and the values of  $E$  and  $\tau$  derived from them, we base our calculation off those in Beirle et al. (2011) and Lu et al. (2015). Lu et al. (2015) use the values in Table S2. The value of 25% for the uncertainty in the VCDs used in Lu et al. (2015) is below the lower bound of uncertainty given in Boersma et al. (2004), likely reflecting improvements such as the temperature correction of the  $\text{NO}_2$  cross section used in determining the scattering weights.

Our computation of uncertainty differs from Lu et al. (2015) in that we include the uncertainty for the VCDs in the calculation of uncertainty for  $\tau$ . As shown in this paper, the choice of a priori profiles can introduce a spatial bias into the exponential decay related to effective lifetime, therefore the inclusion of the VCD uncertainty in the lifetime uncertainty is logical.

To compute the uncertainty due to the fitting process itself, we first need the standard deviations of the fitting parameters. We begin by computing the variance-covariance matrix as (Bard, 1974; Dovì et al., 1991):



| Source                                 | Uncertainty | Citation             |
|----------------------------------------|-------------|----------------------|
| VCD                                    | 25%         | Lu et al. (2015)     |
| Across wind integration dist.          | 10%         | Beirle et al. (2011) |
| Choice of wind fields                  | 10%         | Beirle et al. (2011) |
| Fitting uncertainty                    | Computed    | §S5                  |
| NO <sub>x</sub> :NO <sub>2</sub> ratio | 10%         | Beirle et al. (2011) |

**Table S2.** Values of uncertainty for the various steps of the EMG fitting process.

$$Cov([a, x_0, \mu_x, \sigma_x, B]) \approx \text{diag}(s^2 \mathbf{H}^{-1}); \text{ where} \quad (\text{S5})$$

$$s^2 = \frac{1}{n_{\text{fit}} - 5} \sum_x [\text{NO}_2(x) - F(x|a, x_0, \mu_x, \sigma_x, B)]^2 \quad (\text{S6})$$

that is, the variance-covariance matrix of the fitting parameters is approximately equal to the inverse Hessian matrix for the fitting function (Eq. 10) evaluated at the optimum values of the fitting parameters and scaled by  $s^2$ , the sum of squared residuals for the optimum fit divided by the number of degrees of freedom. The variance for each parameter is, as usual, the corresponding element on the diagonal of the variance-covariance matrix.

In Eq. S5, we use the Hessian matrix returned by the unconstrained Matlab minimization function `fminunc`. The documentation for `fmincon` states that the Hessian matrix returned can be inaccurate; therefore we pass the fitting function (Eq. 10) to `fminunc` and initialize it at the optimum values of the fitting parameters. `fminunc` is set to only evaluate the fitting function once; this returns the unconstrained Hessian at the constrained optimum found by `fmincon`.

As in Beirle et al. (2011), we represent the uncertainty in the fitting parameters due to the fitting process as 95% confidence intervals. We compute these for each individual parameter with:

$$c_{95} = \frac{t\sigma}{\sqrt{n_{\text{fit}}}} \quad (\text{S7})$$

where  $t$  is Student's  $t$ -value and is computed in Matlab as `tinv(0.975, n_fit - 5)`. (0.975 is used as the  $p$  value because `tinv` returns one-tailed  $t$  values, so 0.975 returns the 0.95 two-tailed value.)  $n_{\text{fit}}$  is the number of points used to obtain the fit, and  $n_{\text{fit}} - 5$  degrees of freedom are used for determine the value of  $t$  because 5 degrees of freedom have been fixed in the fitting process, one each for the five parameters fit. The standard deviation,  $\sigma$ , is taken as the square root of the corresponding diagonal element of the variance-covariance matrix from Eq. (S5). This treatment assumes that each of the fitting parameters is independent. Both the covariance matrix and an analysis of the change in optimum values for four of the parameters if one is fixed shows that the parameters are not fully independent, but using individual confidence intervals for each parameter lends itself to a more intuitive understanding of the uncertainty than would attempting to derive a five-dimensional confidence region for the five fitting parameters.

To combine this uncertainty with the other sources identified in Beirle et al. (2011) (VCD, across wind distance, and wind field), the uncertainties are then simply added in quadrature:

$$u_p = p \cdot \sqrt{\left(\frac{c_{95,p}}{p}\right)^2 + (\%u_{VCD})^2 + (\%u_b)^2 + (\%u_{wf})^2} \quad (\text{S8})$$

where  $p$  is the value of the fitting parameter,  $u_p$  the total uncertainty for the parameter,  $c_{95,p}$  the confidence interval for that parameter, and  $\%u_{VCD}$ ,  $\%u_b$ , and  $\%u_{wf}$  are the percent uncertainties in VCDs, across wind integration direction, and choice of wind fields given in Table S2 as decimal values (i.e.  $\%u_b = 0.1$ ).

The uncertainty for lifetime ( $\tau$ ) and emissions ( $E$ ) are then propagated from the fitting parameter uncertainties. For lifetime:

$$\tau = \frac{x_0}{w} \quad (\text{S9})$$

$$\begin{aligned} u_\tau^2 &= \left(\frac{\partial \tau}{\partial x_0} u_{x_0}\right)^2 + \left(\frac{\partial \tau}{\partial w} u_w\right)^2 \\ &= \left(\frac{1}{w} u_{x_0}\right)^2 + \left(\frac{-x_0}{w^2} u_w\right)^2 \end{aligned} \quad (\text{S10})$$

where  $w$  is the average wind speed. We compute  $u_w$  as the 95% confidence interval of the distribution of winds that fall within the bin used; that is, if we consider all days with wind speed  $> 3 \text{ m s}^{-1}$ , then this is the 95% confidence interval of the distribution of wind speeds  $> 3 \text{ m s}^{-1}$ . This helps account for the uncertainty in lifetime introduced because different wind speeds lead to different  $\text{NO}_x$  lifetimes (Valin et al., 2013).

For emissions:

$$E = \frac{r a w}{x_0} = \frac{r a}{\tau} \quad (\text{S11})$$

$$\begin{aligned} u_E^2 &= \left(\frac{\partial E}{\partial r} u_r\right)^2 + \left(\frac{\partial E}{\partial a} u_a\right)^2 + \left(\frac{\partial E}{\partial \tau} u_\tau\right)^2 \\ &= \left(\frac{a}{\tau} u_r\right)^2 + \left(\frac{r}{\tau} u_a\right)^2 + \left(\frac{-r a}{\tau^2} u_\tau\right)^2 \end{aligned} \quad (\text{S12})$$

where  $r$  is the  $\text{NO}_x:\text{NO}_2$  ratio of 1.32 from (Beirle et al., 2011).

## 20 S5 Validation of EMG fitting

To determine if the EMG fitting process is returning good fits to the data, we consider several criteria. First, we examine each fit to the data; all the best fits reproduce the shape of the data very well. Second, we consider the  $R$  value of the fits. Beirle et al. (2011) required an  $R > 0.9$  for a fit to be considered acceptable. Out of 30 fits with an across-wind distance of  $1^\circ$  (2 wind bins for Atlanta and 3 for Birmingham times 3 a priori), only 2 had  $R < 0.9$ , and even then were  $> 0.89$ . The algorithm is finding good fits in nearly every case.

We also consider whether the `fmincon` algorithm is finding the global minimum of the fitting function or becoming trapped in a local minimum. As described in Sect. 2.5, we carry out 9 optimizations from random starting points, in addition to that from the best guess initial values, to sample different parts of the parameter space. We tested increasing the number of random starting points to 99 and found no change in the optimal fitting parameter values. In a separate experiment, we found only one case in which a local minimum, rather than the global minimum, was returned, but repeated fitting with 9 random start point optimizations returned the global minimum. Therefore we find that optimizing from 9 random starting points plus one best guess is a good balance between accuracy and computational efficiency.

## S6 Model lifetime calculation

To compare the EMG derived  $\text{NO}_x$  lifetime against that from the WRF-Chem model, two loss processes were considered:

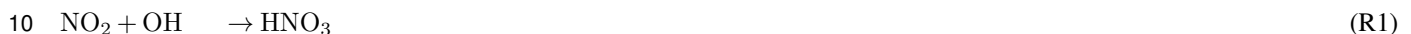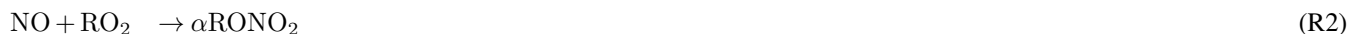

where  $\alpha$  is the  $\text{RONO}_2$  branching ratio. This leads to a total lifetime:

$$\tau_{\text{total}} = \left( \frac{1}{\tau_{\text{HNO}_3}} + \frac{1}{\tau_{\text{RONO}_2}} \right)^{-1} \quad (\text{S13})$$

The lifetime with respect to  $\text{HNO}_3$  is simply:

$$15 \quad \tau_{\text{HNO}_3} = \frac{1}{k_{R1}[\text{OH}]} \quad (\text{S14})$$

while the lifetime with respect to  $\text{RONO}_2$  is:

$$\tau_{\text{RONO}_2} = \left( \sum_i \alpha_i k_{R2,i} [\text{RO}_2]_i \right)^{-1} \quad (\text{S15})$$

The concentrations of the  $\text{RO}_2$  species are not stored in the model output, so we assume steady state (Murphy et al., 2006):

$$\frac{d[\text{RO}_2]}{dt} = 0 = -k_{R2}[\text{RO}_2][\text{NO}] + \sum_i k_{\text{RH}_i+\text{OH}}[\text{RH}]_i[\text{OH}] \quad (\text{S16})$$

$$20 \quad \Rightarrow [\text{RO}_2]_{SS,i} = \left( \sum_i k_{\text{RH}_i+\text{OH}}[\text{RH}]_i[\text{OH}] \right) / (k_{R2}[\text{NO}]) \quad (\text{S17})$$

The overall lifetime is then:

$$\tau_{\text{total}} = \left( k_{R1}[\text{OH}] + \sum_i \alpha_i k_{R2,i} [\text{RO}_2]_{SS,i} \right)^{-1} \quad (\text{S18})$$

## References

- Bard, Y.: Interpretation of the Estimates, chap. VII, Academic Press Inc., 1974.
- Beirle, S., Boersma, K., Platt, U., Lawrence, M., and Wagner, T.: "Megacity Emissions and Lifetimes of Nitrogen Oxides Probed from Space", *Science*, 333, 1737–1739, 2011.
- 5 Boersma, K., Eskes, H., and Brinksma, E.: "Error analysis for tropospheric NO<sub>2</sub> retrieval from space, *J. Geophys. Res. Atmos.*, 106, D04 311, doi:10.1029/2003JD003962, 2004.
- Dovì, V., Paladino, O., and Reverberi, A.: Some remarks on the Use of the Inverse Hessian Matrix of the Likelihood Function in the Estimation of Statistical Properties of Parameters, *Appl. Math. Lett.*, 4, 87–90, 1991.
- Endlick, R., Singleton, R., and Kaufman, J.: Spectral Analysis of Detailed Vertical Wind Speed Profiles, *J. Atmos. Sci.*, 26, 1030–1041,  
10 1969.
- Levelt, P., van der Oord, G., Dobber, M., Mälkki, A., Visser, H., de Vries, J., Stammes, P., Lundell, J., and Saari, H.: The Ozone Monitoring Instrument, *IEEE Trans. Geosci. Remote Sense.*, 44, 1093–1101, doi:10.1109/TGRS.2006.872333, 2006.
- Lu, Z., Streets, D., de Foy, B., Lamsal, L., Duncan, B., and Xing, J.: "Emissions of nitrogen oxides from US urban areas: estimation from Ozone Monitoring Instrument retrievals for 2005–2014", *Atmos. Chem. Phys.*, 15, 10 367–10 383, doi:10.5194/acp-15-10367-2015, 2015.
- 15 McLinden, C. A., Fioletov, V., Boersma, K. F., Kharol, S. K., Krotkov, N., Lamsal, L., Makar, P. A., Martin, R. V., Veefkind, J. P., and Yang, K.: Improved satellite retrievals of NO<sub>2</sub> and SO<sub>2</sub> over the Canadian oil sands and comparisons with surface measurements, *Atmos. Chem. Phys.*, 14, 3637–3656, doi:10.5194/acp-14-3637-2014, 2014.
- Murphy, J. G., Day, D. A., Cleary, P. A., Wooldridge, P. J., Millet, D. B., Goldstein, A. H., and Cohen, R. C.: The weekend effect within and downwind of Sacramento: Part 2. Observational evidence for chemical and dynamical contributions, *Atmos. Chem. Phys. Discuss.*,  
20 6, 11 971–12 019, doi:10.5194/acpd-6-11971-2006, 2006.
- Robere, R.: Interior Point Methods and Linear Programming, <http://www.cs.toronto.edu/~robere/paper/interiorpoint.pdf>, 2012.
- Valin, L., Russell, A., and Cohen, R.: "Variations of OH radical in an urban plume inferred from NO<sub>2</sub> column measurements", *Geophys. Res. Lett.*, 40, 1856–1860, doi:10.1002/grl.50267, 2013.
- Wright, M.: The interior-point revolution in optimization: History, recent developments, and lasting consequences, *Bull. Amer. Math. Soc.*,  
25 42, 39–56, <http://www.ams.org/journals/bull/2005-42-01/S0273-0979-04-01040-7/>, 2005.
